# Supplementary material for: BCL2A1a Over-Expression in Murine Hematopoietic Stem and Progenitor Cells Decreases Apoptosis and Results in Hematopoietic Transformation
Source: PLoS One. 2012 Oct 30;7(10):e48267. doi: 10.1371/journal.pone.0048267 (PMC3484072; doi:10.1371/journal.pone.0048267)
Supplement: Table S1 — Analyses of lentiviral insertion sites. Mapping of lentiviral insertion sites from the bone marrow cells of two BCL2A1a mice (primary #25 and secondary #23-11) with tumors, and one vector control mouse without tumor (primary #7). Mice #7 and #25 were analyzed by LAM-PCR [38] and mouse #23-11 was analyzed by LM-PCR [39]–[40]. (XLSX) [file pone.0048267.s005.xlsx]

## Sheet: gene functions
mouse #7
GENE	Full Name	Function
Akt2	thymoma viral proto-oncogene 2	Protooncogene,signalling (PI3K,mTOR etc)
EvI	na-vasodilator stimulated phosphoprotein	focal adhesion, cytoskeleton, actin filament based movement etc.
Chl1	cell adhesion molecule with homology to L1CAM	adult locomotory behavior, axon guidance, nervous system development
Macrod2	MACRO domain containing 2	The macro domain is a high-affinity ADP-ribose binding module found in a variety of proteins as a stand-alone domain or in a variety of proteins as a stand-alone domain or in combination with other domains like in histone macroH2A and some PARPs
Zfp148	zinc finger protein 148	a novel transcription factor involved in erythroid and megakaryocytic development and suggest that it serves a cooperative function with GATA-1 and/or FOG-1 in a developmental stage-specific manner
wsc2	Wolf-Hirschhorn syndrome candidate 2	regulation of transcription, DNA-dependent
4632434I11Rik	Noxin	may be a component of the cell defense system: it is activated by various stress stimuli, helps cells to withdraw from cycling, and opposes apoptosis
Gap2	growth factor receptor bound protein 2-associated protein 2	Overexpression of wild-type growth factor receptor bound protein 2 in A20 cells suppressed Fas-mediated apoptosis, and enhanced B-cell mediated rescue from Fas-induced cell death.Activation of PI3K by c-Kit is dependent both on thedirect PI3K-binding site in c-Kit and on the phosphorylation of Gab2.
no gene
Ube2cbp	N/A
Nova1	neuro-oncological ventral antigen 1	neural development
Wrn	Werner syndrome homolog	Wrn null mice have impaired glucose homeostasis and fat metabolism, and may be a useful model to investigate metabolic conditions associated with aging. Teleomere maintenance.
Lass4	LAG1 homolog, ceramide synthase 4	Regulate synthesis of specific ceramides
Mouse#21
GENE	Full Name	Function
Atp10a	ATPase, class V, type 10A	The protein encoded by this gene belongs to the family of P-type cation transport ATPases, and to the subfamily of aminophospholipid-transporting ATPases. It maps within the most common interval of deletion responsible for Angelman syndrome, also known as 'happy puppet syndrome'
???		no ref seq
AK 079066	adult male diencephalon cDNA	N/A
Nck2	non-catalytic region of tyrosine kinase adaptor protein 2	Cytokine signaling. The Nck adapters are needed for signaling to Rho GTPases and actin dynamics downstream of the PDGFbeta receptor.
Cdy1	chromodomain protein, Y chromosome-like (Cdyl), transcript variant 1	Transcription repressor. Proteins encoded by this gene superfamily possess a chromodomain, a motif implicated in chromatin binding and gene suppression, and a catalytic domain believed to be involved in histone acetylation. Multiple proteins are encoded by transcript variants of this gene.
???		SINE
antibody parts
Ppwd1	peptidylprolyl isomerase domain and WD repeat containing 1	isomerase activity IEA peptidyl-prolyl cis-trans isomerase activity
Lmbrd2, Skp2	LMBR1 domain containing 2	N/A
Parp4	poly (ADP-ribose) polymerase family, member 4	Poly(ADP-ribose) polymerase (parp) catalytic domain catalyses the covalent attachment of ADP-ribose units from NAD+ to itself and to a limited number of other DNA binding proteins, which decreases their affinity for DNA. Poly(ADP-ribose) polymerase is a regulatory component induced by DNA damage.
Mc2r	melanocortin 2 receptor	G-protein coupled receptor protein signaling pathway.

## Sheet: Metais JY et al, PLOS ONE
Supplemental Table S1: Insertion sites (IS) analyses performed by LAM-PCR or LM-PCR on genomic DNA isolated from bone marrow cells.
BLAT	http://genome.ucsc.edu/cgi-bin/hgBlat
Genome	Mouse
Assembly	Dec. 2011 (GRCm38/mm10)
Primary Bcl2A1a mouse #25, bone marrow cells by LAM-PCR
#	GENE	CHROMOSOME	IS COORDINATES	STRAND	POSITION OF IS	DISTANCE (bp)	GENE	REF SEQ	FULL NAME
1	Atp10a	7	58706217	+	INTRON		Atp10a	NM_009728.2	Mus musculus ATPase, class V, type 10A (Atp10a), mRNA
2	Cdy1	13	35718629	-	INTRON		Cdy1	NM_009881.3	Mus musculus chromodomain protein, Y chromosome-like (Cdyl), transcript variant 1, mRNA
3	Gm4926	11	46638748	-	INTRON		Gm4926	NR_028066.1	Mus musculus predicted gene 4926 (Gm4926), non-coding RNA
4	Lmbrd2	15	9143252	-	INTRON		Lmbrd2	NM_177178.3	Mus musculus LMBR1 domain containing 2 (Lmbrd2), mRNA
5	Mc2r	18	68422077	-	INTRON		Mc2r	NM_008560.2	Mus musculus melanocortin 2 receptor (Mc2r), mRNA
6	Nck2	1	43467749	-	INTRON		Nck2	NM_010879.3	Mus musculus non-catalytic region of tyrosine kinase adaptor protein 2 (Nck2), mRNA
7	Ppwd1	13	104212705	-	INTRON		Ppwd1	NM_172807.4	Mus musculus peptidylprolyl isomerase domain and WD repeat containing 1 (Ppwd1), mRNA
8	NO GENE ASSIGNED	3	68685016	+			NO GENE	NO REF SEQUENCE
					DOWNSTREAM	58534	Iqcj-schip1	NM_001113419.2	Mus musculus IQ motif containing J-schwannomin interacting protein 1 readthrough (Iqcj-schip1), mRNA
					UPSTREAM	5628	Il12a	NM_001159424.1	Mus musculus interleukin 12a (Il12a), transcript variant 1, mRNA
					UPSTREAM	184570	1110032F04Rik	NM_001167996.1	Mus musculus RIKEN cDNA 1110032F04 gene (1110032F04Rik), mRNA
9	NO GENE ASSIGNED	6	70072158	+			NO GENE	LINE
					DOWNSTREAM	744984	Rprl1	NR_004434.3	Mus musculus ribonuclease P RNA-like 1 (Rprl1), RNase P RNA
					UPSTREAM	693562	Rpia	NM_009075.2	Mus musculus ribose 5-phosphate isomerase A (Rpia), mRNA
10	NO GENE ASSIGNED	17	35798636	-			NO GENE	SINE
					DOWNSTREAM	17949	4833427F10Rik	NR_045459.1	Mus musculus RIKEN cDNA 4833427F10 gene (4833427F10Rik), non-coding RNA
					DOWNSTREAM	98046	Ddr1	NM_001198833.1	Mus musculus discoidin domain receptor family, member 1 (Ddr1), transcript variant 4, mRNA
					UPSTREAM	23077	Ier3	NM_133662.2	Mus musculus immediate early response 3 (Ier3), mRNA
					UPSTREAM	24721	Flot1	NM_008027.2	Mus musculus flotillin 1 (Flot1), mRNA
					UPSTREAM	35284	Tubb5	NM_011655.5	Mus musculus tubulin, beta 5 class I (Tubb5), mRNA
					UPSTREAM	42862	Mdc1	NM_001010833.2	Mus musculus mediator of DNA damage checkpoint 1 (Mdc1), mRNA
					UPSTREAM	62682	Nrm	NM_134122.2	Mus musculus nurim (nuclear envelope membrane protein) (Nrm), mRNA
					UPSTREAM	66959	Ppp1r18	NM_001146711.1	Mus musculus protein phosphatase 1, regulatory subunit 18 (Ppp1r18), transcript variant 3, mRNA
Primary vector mouse #7, bone marrow cells by LAM-PCR
	GENE	CHROMOSOME	IS COORDINATES	STRAND	POSITION OF IS	DISTANCE (bp)	GENE	REF SEQ	FULL NAME
1	4632434I11Rik	7	92864945	+	INTRON		4632434I11Rik	NM_001080995.1	Mus musculus RIKEN cDNA 4632434I11 gene (4632434I11Rik), mRNA
2	Akt2	7	27598545	-	INTRON		Akt2	NM_001110208.1	Mus musculus thymoma viral proto-oncogene 2 (Akt2), transcript variant 1, mRNA
3	Chl1	6	103649161	-	INTRON		Chl1	NM_007697.2	Mus musculus cell adhesion molecule with homology to L1CAM (Chl1), mRNA
4	EvI	12	108617073	+	INTRON		EvI	NM_007965.3	Mus musculus Ena-vasodilator stimulated phosphoprotein (Evl), transcript variant 2, mRNA
5	Gab2	7	97253171	+	INTRON		Gab2	NM_001162477.1	Mus musculus growth factor receptor bound protein 2-associated protein 2 (Gab2), transcript variant 2, mRNA
6	Lass4	8	4507898	+	INTRON		Lass4	NM_026058.4	Mus musculus LAG1 homolog, ceramide synthase 4 (Lass4), mRNA
7	Macrod2	2	141455054	-	INTRON		Macrod2	NM_001013802.3	Mus musculus MACRO domain containing 2 (Macrod2), transcript variant 1, mRNA
8	Nova1	12	46816312	+	INTRON		Nova1	NM_021361.1	Mus musculus neuro-oncological ventral antigen 1 (Nova1), mRNA
9	Ube2cbp	9	86310780	+	INTRON		Ube2cbp	NM_027394.2	Mus musculus ubiquitin-conjugating enzyme E2C binding protein (Ube2cbp), mRNA
10	Whsc2	5	33933538	+	INTRON		Whsc2	NM_011914.2	Mus musculus Wolf-Hirschhorn syndrome candidate 2 (human) (Whsc2), mRNA
11	Wrn	8	33352037	+	INTRON		Wrn	NM_011721.4	Mus musculus Werner syndrome homolog (human) (Wrn), transcript variant 1, mRNA
12	Zfp148	16	33429827	+	INTRON		Zfp148	NM_011749.4	Mus musculus zinc finger protein 148 (Zfp148), mRNA
13	NO GENE ASSIGNED	12	54469750	+			NO GENE	LTR
					DOWNSTREAM	78432	Gm7550	NR_033689.1	Mus musculus predicted gene 7550 (Gm7550), non-coding RNA
					UPSTREAM	175624	1110002B05Rik	NM_134054.2	Mus musculus RIKEN cDNA 1110002B05 gene (1110002B05Rik), mRNA
Secondary Bcl2A1a mouse #23-11, bone marrow cells by LM-PCR
	GENE	CHROMOSOME	IS COORDINATES	STRAND	POSITION OF IS	DISTANCE (bp)	GENE	REF SEQ	FULL NAME
1	Cntnap2	6	45795144	-	INTRON		Cntnap2	NM_001004357.2	Mus musculus contactin associated protein-like 2 (Cntnap2), transcript variant 1, mRNA
2	Rnf111	9	70452257	-	INTRON		Rnf111	NM_033604.2	Mus musculus ring finger 111 (Rnf111), mRNA
3	Srgap1	10	121935581	+	INTRON		Srgap1	NM_001081037.2	Mus musculus SLIT-ROBO Rho GTPase activating protein 1 (Srgap1), transcript variant 1, mRNA
4	Zcchc7	4	44842493	-	INTRON		Zcchc7	NM_138590.4	Mus musculus zinc finger, CCHC domain containing 7 (Zcchc7), mRNA
5	NO GENE ASSIGNED	4	114334166	+			NO GENE	LTR
					DOWNSTREAM	89138	Skint11	NM_177669.4	Mus musculus selection and upkeep of intraepithelial T cells 11 (Skint11), transcript variant 2, mRNA
					UPSTREAM	72558	Gm12824	NM_001085549.1	Mus musculus predicted gene 12824 (Gm12824), mRNA
6	NO GENE ASSIGNED	15	66511980	+			NO GENE	LTR
					DOWNSTREAM	11070	Lrrc6	NM_019457.2	Mus musculus leucine rich repeat containing 6 (testis) (Lrrc6), mRNA
					DOWNSTREAM	225756	Kcnq3	NM_152923.2	Mus musculus potassium voltage-gated channel, subfamily Q, member 3 (Kcnq3), mRNA
					UPSTREAM	14232	Tmem71	NM_172514.3	Mus musculus transmembrane protein 71 (Tmem71), mRNA
					UPSTREAM	65592	Phf20I1	NM_001081409.1	Mus musculus PHD finger protein 20-like 1 (Phf20l1), mRNA
					UPSTREAM	158790	Tg	NM_009375.2	Mus musculus thyroglobulin (Tg), mRNA
IS	Isertion Site
DISTANCE (bp)	Distance in base pairs to the 3' end of the gene if the IS is downstream of the gene or distance to the 5' end of the gene if the IS is upstream of the gene.
REF SEQ	Reference Sequence at http://www.ncbi.nlm.nih.gov
LAM-PCR	Linear Amplification Mediated Polymerase Chaine Reaction was performed as described in :
		Métais JY, Topp S, Doty RT, Borate B, Nguyen AD, et al. (2010) Feline leukemia virus integrase and capsid packaging functions do not change the insertion profile of standard Moloney retroviral vectors. Gene Ther 17: 799-804.
LM-PCR	Linker Mediated Polymerase Chain Reaction was adapted from Kustikova et al. and from Schmidt et al :
		Kustikova OS, Baum C, Fehse B (2008) Retroviral integration site analysis in hematopoietic stem cells. Methods Mol Biol 430: 255-267.
		Schmidt M, Hoffmann G, Wissler M, Lemke N, Mussig A, et al. (2001) Detection and direct genomic sequencing of multiple rare unknown flanking DNA in highly complex samples. Hum Gene Ther 12: 743-749.
